# Supplementary material
Source: publisher site journal article supplement (https://www.dovepress.com/article/346816)
Supplement: Supplementary file 1 [file get_supplementary_file.php]

**Supplemental Table 1.** Baseline Elixhauser comorbidities, overall and among the escalation analysis cohort.

| Elixhauser Comorbidities <sup>a,b,c</sup> , n (%) | Overall eculizumab cohort | Escalation analysis cohort <sup>d</sup> |
|---------------------------------------------------|---------------------------|-----------------------------------------|
|                                                   | N = 707                   | N = 121                                 |
| Hypertension                                      | 180 (25.5)                | 30 (24.8)                               |
| Hypertension, uncomplicated                       | 148 (20.9)                | 27 (22.3)                               |
| Hypertension, complicated                         | 85 (12.0)                 | 7 (5.8)                                 |
| Coagulopathy                                      | 172 (24.3)                | 48 (39.7)                               |
| Renal failure                                     | 127 (18.0)                | 12 (9.9)                                |
| Deficiency anemias                                | 85 (12.0)                 | 23 (19.0)                               |
| Rheumatoid arthritis/collagen vascular disease    | 67 (9.5)                  | 5 (4.1)                                 |
| Cardiac arrhythmias                               | 52 (7.4)                  | 10 (8.3)                                |
| Diabetes                                          | 48 (6.8)                  | 6 (5.0)                                 |
| Diabetes, uncomplicated                           | 34 (4.8)                  | 5 (4.1)                                 |
| Diabetes, complicated                             | 26 (3.7)                  | 3 (2.5)                                 |
| Chronic pulmonary disease                         | 42 (5.9)                  | 5 (4.1)                                 |
| Liver disease                                     | 33 (4.7)                  | 5 (4.1)                                 |
| Valvular disease                                  | 30 (4.2)                  | 8 (6.6)                                 |
| Solid tumor without metastasis                    | 27 (3.8)                  | 5 (4.1)                                 |
| Weight loss                                       | 27 (3.8)                  | 4 (3.3)                                 |
| Peripheral vascular disorders                     | 24 (3.4)                  | 4 (3.3)                                 |
| Pulmonary circulation disorder                    | 24 (3.4)                  | 5 (4.1)                                 |
| Obesity                                           | 24 (3.4)                  | 6 (5.0)                                 |
| Congestive heart failure                          | 22 (3.1)                  | 2 (1.7)                                 |
| Lymphoma                                          | 20 (2.8)                  | 1 (0.8)                                 |
| Other neurological disorders                      | 19 (2.7)                  | 2 (1.7)                                 |
| Blood loss anemia                                 | 14 (2.0)                  | 7 (5.8)                                 |
| Fluid and electrolyte disorders                   | 8 (1.1)                   | 2 (1.7)                                 |
| Metastatic cancer                                 | 8 (1.1)                   | 0 (0.0)                                 |
| Peptic ulcer disease                              | 7 (1.0)                   | 2 (1.7)                                 |
| Hypothyroidism                                    | 5 (0.7)                   | 1 (0.8)                                 |
| Alcohol abuse                                     | 5 (0.7)                   | 1 (0.8)                                 |
| Drug abuse                                        | 5 (0.7)                   | 1 (0.8)                                 |
| Paralysis                                         | 3 (0.4)                   | 0 (0.0)                                 |
| HIV/AIDS                                          | 2 (0.3)                   | 0 (0.0)                                 |

**Abbreviations:** AIDS: acquired immune deficiency syndrome; HIV: human immunodeficiency virus; ICD-9-CM: International Classification of Diseases, 9<sup>th</sup> Revision, Clinical Modification; ICD-10-CM: International Classification of Diseases, 10<sup>th</sup> Revision, Clinical Modification

**Notes:**

- a. Reference: Quan H, Sundararajan V, Halfon P, et al. Coding algorithms for defining comorbidities in ICD-9-CM and ICD-10 administrative data. *Med Care.* 2005;43(11):1130-1139.  
doi:10.1097/01.mlr.0000182534.19832.83.
- b. Evaluated during the 3-month baseline period, not including the index date.
- c. See Online Resource 10 for a complete list of ICD-9/10-CM diagnosis codes.

- d. The escalation analysis cohort is a subset of patients from the overall eculizumab cohort who had a label-recommended induction phase (i.e. received 4 doses of 600 mg eculizumab infusion, each 7 days  $\pm$  2 days apart) and received  $\geq 1$  dose of eculizumab infusion during treatment in the maintenance phase.

**Supplemental Table 2. ICD-9/10-CM Codes for Quan-Charlson Comorbidity Index Score**

| Condition                                                                          | ICD-9-CM Diagnosis Codes                                                                                      | ICD-10-CM Diagnosis Codes                                                                                                                                                     |
|------------------------------------------------------------------------------------|---------------------------------------------------------------------------------------------------------------|-------------------------------------------------------------------------------------------------------------------------------------------------------------------------------|
| Any malignancy, including lymphoma and leukemia, except malignant neoplasm of skin | 140.x–172.x, 174.x–195.8, 200.x–208.x, 238.6                                                                  | C41.x, C43.x, C45.x–C58.x, C60.x–C76.x, C81.x–C85.x, C88.x, C90.x–C97.x                                                                                                       |
| Cerebrovascular disease                                                            | 362.34, 430.x–438.x                                                                                           | G45.x, G46.x, H34.0, I60.x–I69.x                                                                                                                                              |
| Chronic pulmonary disease                                                          | 416.8, 416.9, 490.x–505.x, 506.4, 508.1, 508.8                                                                | I27.8, I27.9, J40.x–J47.x, J60.x–J67.x, J68.4, J70.1, J70.3                                                                                                                   |
| Congestive heart failure                                                           | 398.91, 402.01, 402.11, 402.91, 404.01, 404.03, 404.11, 404.13, 404.91, 404.93, 425.4–425.9, 428.x            | I09.9, I11.0, I13.0, I13.2, I25.5, I42.0, I42.5–I42.9, I43.x, I50.x, P29.0                                                                                                    |
| Dementia                                                                           | 290.x, 294.1, 331.2                                                                                           | F00.x–F03.x, F05.1, G30.x, G31.1                                                                                                                                              |
| Diabetes with chronic complication                                                 | 250.4–250.7                                                                                                   | E10.2–E10.5, E10.7, E11.2–E11.5, E11.7, E12.2–E12.5, E12.7, E13.2–E13.5, E13.7, E14.2–E14.5, E14.7                                                                            |
| Diabetes without chronic complication                                              | 250.0–250.3, 250.8, 250.9                                                                                     | E10.0, E10.1, E10.6, E10.8, E10.9, E11.0, E11.1, E11.6, E11.8, E11.9, E12.0, E12.1, E12.6, E12.8, E12.9, E13.0, E13.1, E13.6, E13.8, E13.9, E14.0, E14.1, E14.6, E14.8, E14.9 |
| Hemiplegia or paraplegia                                                           | 334.1, 342.x, 343.x, 344.0–344.6, 344.9                                                                       | G04.1, G11.4, G80.1, G80.2, G81.x, G82.x, G83.0–G83.4, G83.9                                                                                                                  |
| HIV/AIDS                                                                           | 042.x–044.x                                                                                                   | B20.x–B22.x, B24.x                                                                                                                                                            |
| Metastatic solid tumor                                                             | 196.x–199.x                                                                                                   | C77.x–C80.x                                                                                                                                                                   |
| Mild liver disease                                                                 | 070.22, 070.23, 070.32, 070.33, 070.44, 070.54, 070.6, 070.9, 570.x, 571.x, 573.3, 573.4, 573.8, 573.9, V42.7 | K71.3–K71.5, K71.7, K73.x, K74.x, K76.0, K76.2–K76.4, K76.8, K76.9, Z94.4                                                                                                     |
| Moderate or severe liver disease                                                   | 456.0–456.2, 572.2–572.8                                                                                      | I85.0, I85.9, I86.4, I98.2, K70.4, K71.1, K72.1, K72.9, K76.5, K76.6, K76.7                                                                                                   |
| Myocardial infarction                                                              | 410.x, 412.x                                                                                                  | I21.x, I22.x, I25.2                                                                                                                                                           |
| Peptic ulcer disease                                                               | 531.x–534.x                                                                                                   | K25.x–K28.x                                                                                                                                                                   |
| Peripheral vascular disease                                                        | 093.0, 437.3, 440.x, 441.x, 443.1–443.9, 47.1, 557.1, 557.9, V43.4                                            | I70.x, I71.x, I73.1, I73.8, I73.9, I77.1, I79.0, I79.2, K55.1, K55.8, K55.9, Z95.8, Z95.9                                                                                     |
| Renal disease                                                                      | 404.03, 404.12, 404.13, 404.92, 404.93, 582.x, 583.0–583.7, 585.x, 586.x, 588.0, V42.0, V45.1, V56.x          | N05.7, N18.x, N19.x, N25.0, Z49.0–Z49.2, Z94.0, Z99.2                                                                                                                         |
| Rheumatic disease                                                                  | 446.5, 710.0–710.4, 714.0–714.2, 714.8, 725.x                                                                 | M05.x, M06.x, M31.5, M32.x–M34.x, M35.1, M35.3, M36.0                                                                                                                         |

AIDS: acquired immune deficiency syndrome; HIV: human immunodeficiency viruses; ICD-10-CM: International Classification of Diseases, 10th Revision, Clinical Modification

**Source:**

Quan H et al. Updating and Validating the Charlson Comorbidity Index and Score for Risk Adjustment in Hospital Discharge Abstracts Using Data From 6 Countries. *Am J Epidemiol* 2011; 173 (6): 676-682.

**Supplemental Table 3. ICD-9/10-CM Codes for PNH-Related Comorbidities**

| <b>Condition</b>         | <b>ICD-9-CM Diagnosis Codes</b> | <b>ICD-10-CM Diagnosis Codes</b> |
|--------------------------|---------------------------------|----------------------------------|
| Aplastic anemia          | 284                             | D61.x                            |
| Myelodysplastic syndrome | 238.72-238.75                   | D46.x                            |

ICD-10-CM: International Classification of Diseases, 10th Revision, Clinical Modification; PNH: paroxysmal nocturnal hemoglobinuria

**Supplemental Table 4. ICD-9/10-CM Codes for Clinical Manifestations of PNH**

| <b>Condition</b>                    | <b>ICD-9-CM Diagnosis Codes</b>                 | <b>ICD-10-CM Diagnosis Codes</b>                                                                     |
|-------------------------------------|-------------------------------------------------|------------------------------------------------------------------------------------------------------|
| Abdominal pain                      | 789.0x, 789.6                                   | R10.0-R10.3, R10.8, R10.9                                                                            |
| Anemia (excluding aplastic anemia)  | 280.x-282.x, 283.0x, 283.1x, 283.9x, 285.x      | D50.x-D53.x, D55.x-D58.x, D59.0, D59.1, D59.2, D59.3, D59.4, D59.6, D59.8, D59.9, D60.x, D62.x-D64.x |
| Chronic kidney disease              | 403.x, 404.x, 585.x                             | I12.0, I12.9, I13.0, I13.10, I13.11, I13.2, N18.1-N18.6, N18.9                                       |
| Dysphagia                           | 787.2x                                          | R13.1.x                                                                                              |
| Dyspnea                             | 786.02, 786.05                                  | R06.0x                                                                                               |
| Erectile dysfunction                | 607.84                                          | N52.0, N52.1                                                                                         |
| Fatigue                             | 780.71, 780.79                                  | R53.82, R53.83                                                                                       |
| Infections                          | 001-139                                         | A00.x-B99.x                                                                                          |
| Sepsis                              | 038, 790.7, 995.91, 995.92                      | A40.x, A41.x, R65.2, R78.81                                                                          |
| Respiratory infections              | 460-466, 472, 473, 476, 480-488                 | J00.x-J06.x, J09.x-J18.x, J31.x, J32.x, J37.x, R05.x                                                 |
| Kidney and urinary tract infections | 590.0, 590.1, 590.80, 590.9, 595, 597.80, 599.0 | N10.x, N11.0, N11.1, N12.x, N15.9, N30.x, N34.x, N39.0                                               |
| Pulmonary hypertension              | 416.0, 416.8                                    | I27.0, I27.2                                                                                         |
| Thrombosis                          | 444.x, 452, 453.x                               | I74.x, I81.x, I82.x                                                                                  |

ICD-9-CM: International Classification of Diseases, 9th Revision, Clinical Modification; ICD-10-CM: International Classification of Diseases, 10th Revision, Clinical Modification; PNH: paroxysmal nocturnal hemoglobinuria

**Supplemental Table 5. HCPCS Codes for PNH-Related Treatments of Interest—Systemic Corticosteroids**

| <b>Agent</b>       | <b>Description</b>                                                                                                                           | <b>Code</b> |
|--------------------|----------------------------------------------------------------------------------------------------------------------------------------------|-------------|
| Betamethasone      | Betamethasone, inhalation solution, compounded product, administered through dme, unit dose form, per milligram                              | J7624       |
| Betamethasone      | Injection, betamethasone acetate 3 mg and betamethasone sodium phosphate 3 mg                                                                | J0702       |
| Budesonide         | Budesonide, inhalation solution, compounded product, administered through dme, concentrated form, per 0.25 milligram                         | J7634       |
| Budesonide         | Budesonide, inhalation solution, compounded product, administered through dme, unit dose form, up to 0.5 mg                                  | J7627       |
| Budesonide         | Budesonide, inhalation solution, FDA-approved final product, non-compounded, administered through dme, concentrated form, per 0.25 milligram | J7633       |
| Budesonide         | Budesonide, inhalation solution, FDA-approved final product, non-compounded, administered through dme, unit dose form, up to 0.5 mg          | J7626       |
| Cortisone          | Injection, hydrocortisone acetate, up to 25 mg                                                                                               | J1700       |
| Cortisone          | Injection, hydrocortisone sodium phosphate, up to 50 mg                                                                                      | J1710       |
| Cortisone          | Injection, hydrocortisone sodium succinate, up to 100 mg                                                                                     | J1720       |
| Dexamethasone      | Dexamethasone, inhalation solution, compounded product, administered through dme, concentrated form, per milligram                           | J7637       |
| Dexamethasone      | Dexamethasone, inhalation solution, compounded product, administered through dme, unit dose form, per milligram                              | J7638       |
| Dexamethasone      | Dexamethasone, oral, 0.25 mg                                                                                                                 | J8540       |
| Dexamethasone      | Injection, dexamethasone acetate, 1 mg                                                                                                       | J1094       |
| Dexamethasone      | Injection, dexamethasone sodium phosphate, 1 mg                                                                                              | J1100       |
| Dexamethasone      | Injection, dexamethasone, intravitreal implant, 0.1 mg                                                                                       | J7312       |
| Hydrocortisone     | Injection, hydrocortisone acetate, up to 25 mg                                                                                               | J1700       |
| Hydrocortisone     | Injection, hydrocortisone sodium phosphate, up to 50 mg                                                                                      | J1710       |
| Hydrocortisone     | Injection, hydrocortisone sodium succinate, up to 100 mg                                                                                     | J1720       |
| Methylprednisolone | Injection, methylprednisolone acetate, 20 mg                                                                                                 | J1020       |
| Methylprednisolone | Injection, methylprednisolone acetate, 40 mg                                                                                                 | J1030       |
| Methylprednisolone | Injection, methylprednisolone acetate, 80 mg                                                                                                 | J1040       |
| Methylprednisolone | Injection, methylprednisolone sodium succinate, up to 125 mg                                                                                 | J2930       |
| Methylprednisolone | Injection, methylprednisolone sodium succinate, up to 40 mg                                                                                  | J2920       |
| Methylprednisolone | Methylprednisolone oral, per 4 mg                                                                                                            | J7509       |
| Prednisolone       | Injection, methylprednisolone acetate, 20 mg                                                                                                 | J1020       |
| Prednisolone       | Injection, methylprednisolone acetate, 40 mg                                                                                                 | J1030       |
| Prednisolone       | Injection, methylprednisolone acetate, 80 mg                                                                                                 | J1040       |
| Prednisolone       | Injection, methylprednisolone sodium succinate, up to 125 mg                                                                                 | J2930       |
| Prednisolone       | Injection, methylprednisolone sodium succinate, up to 40 mg                                                                                  | J2920       |
| Prednisolone       | Injection, prednisolone acetate, up to 1 ml                                                                                                  | J2650       |
| Prednisolone       | Methylprednisolone oral, per 4 mg                                                                                                            | J7509       |
| Prednisolone       | Prednisolone oral, per 5 mg                                                                                                                  | J7510       |
| Prednisone         | Prednisone, immediate release or delayed release, oral, 1 mg                                                                                 | J7512       |
| Prednisone         | Prednisone, oral, per 5 mg                                                                                                                   | J7506       |
| Triamcinolone      | Injection, triamcinolone acetonide, not otherwise specified, 10 mg                                                                           | J3301       |
| Triamcinolone      | Injection, triamcinolone acetonide, preservative free, 1 mg                                                                                  | J3300       |
| Triamcinolone      | Injection, triamcinolone diacetate, per 5 mg                                                                                                 | J3302       |
| Triamcinolone      | Injection, triamcinolone hexacetonide, per 5 mg                                                                                              | J3303       |
| Triamcinolone      | Triamcinolone, inhalation solution, compounded product, administered through dme, concentrated form, per milligram                           | J7683       |
| Triamcinolone      | Triamcinolone, inhalation solution, compounded product, administered through dme, unit dose form, per milligram                              | J7684       |

HCPCS: Healthcare Commons Procedure Coding System; PNH: paroxysmal nocturnal hemoglobinuria

Supplemental Table 6. GPI and NDC Codes for PNH-Related Treatments of Interest—Systemic Corticosteroids

| Agent         | Description                                                  | GPI code             | NDC code    |
|---------------|--------------------------------------------------------------|----------------------|-------------|
| Betamethasone | *Betameth Na Pho&Acc Inj 6 MG/ML & Bupiv 0.25% & Lido1% Kit* | 22 10 99 04 20 64 20 | 45861012901 |
| Betamethasone | *Betameth Na Pho&Acc Inj 6 MG/ML & Bupiv 0.25% & Lido1% Kit* | 22 10 99 04 20 64 20 | 76420078201 |
| Betamethasone | *Betameth Na Pho&Acc Inj 6 MG/ML & Bupiv 0.5% & Lido1% Kit*  | 22 10 99 04 20 64 30 | 49836001720 |
| Betamethasone | *Betameth Na Pho&Acc Inj 6 MG/ML & Bupiv 0.5% & Lido1% Kit*  | 22 10 99 04 20 64 30 | 53225410501 |
| Betamethasone | *Betameth Sod Phos-Ace Inj 30 MG/5 ML & Anesthetic Spr Kit** | 22 10 99 03 08 64 30 | 49836001919 |
| Betamethasone | *Betameth Sod Phos-Ace Inj 30 MG/5 ML & Anesthetic Spr Kit** | 22 10 99 03 08 64 30 | 76420024001 |
| Betamethasone | *Betamethasone Sod Phos & Ace Inj 6 MG/ML & Bupiv 0.25% Kit* | 22 10 99 03 10 64 20 | 45861012801 |
| Betamethasone | *Betamethasone Sod Phos & Ace Inj 6 MG/ML & Bupiv 0.25% Kit* | 22 10 99 03 10 64 20 | 76420078501 |
| Betamethasone | *Betamethasone Sod Phos & Ace Inj 6 MG/ML & Lido Inj 1% Kit* | 22 10 99 03 15 64 20 | 69263081801 |
| Betamethasone | *Betamethasone Sod Phos & Ace Inj 6 MG/ML & Lido Inj 1% Kit* | 22 10 99 03 15 64 20 | 76420076501 |
| Betamethasone | Betamethasone Acetate & Sod Phosphate Inj Susp 3-3 MG/ML     | 22 10 99 02 10 18 10 | 00085056605 |
| Betamethasone | Betamethasone Acetate & Sod Phosphate Inj Susp 3-3 MG/ML     | 22 10 99 02 10 18 10 | 00259037705 |
| Betamethasone | Betamethasone Acetate & Sod Phosphate Inj Susp 3-3 MG/ML     | 22 10 99 02 10 18 10 | 00517072001 |
| Betamethasone | Betamethasone Acetate & Sod Phosphate Inj Susp 3-3 MG/ML     | 22 10 99 02 10 18 10 | 00904081805 |
| Betamethasone | Betamethasone Acetate & Sod Phosphate Inj Susp 3-3 MG/ML     | 22 10 99 02 10 18 10 | 35356008401 |
| Betamethasone | Betamethasone Acetate & Sod Phosphate Inj Susp 3-3 MG/ML     | 22 10 99 02 10 18 10 | 40042004805 |
| Betamethasone | Betamethasone Acetate & Sod Phosphate Inj Susp 3-3 MG/ML     | 22 10 99 02 10 18 10 | 54569163001 |
| Betamethasone | Betamethasone Acetate & Sod Phosphate Inj Susp 3-3 MG/ML     | 22 10 99 02 10 18 10 | 54868020600 |
| Betamethasone | Betamethasone Acetate & Sod Phosphate Inj Susp 3-3 MG/ML     | 22 10 99 02 10 18 10 | 58016919101 |
| Betamethasone | Betamethasone Acetate & Sod Phosphate Inj Susp 3-3 MG/ML     | 22 10 99 02 10 18 10 | 68258895605 |
| Betamethasone | Betamethasone Sod Phos & Acet Inj Kit 30 MG/5 ML (6 MG/ML)   | 22 10 99 02 10 64 30 | 49836001817 |
| Betamethasone | Betamethasone Sod Phos & Acet Inj Kit 30 MG/5 ML (6 MG/ML)   | 22 10 99 02 10 64 30 | 53225366501 |
| Betamethasone | Betamethasone Sod Phos & Acet Inj Kit 30 MG/5 ML (6 MG/ML)   | 22 10 99 02 10 64 30 | 69263082201 |
| Betamethasone | Betamethasone Sod Phosphate & Acet PF Inj 12 (6-6) MG/2ML    | 22 10 99 02 10 18 25 | 62295301802 |
| Betamethasone | Betamethasone Sod Phosphate & Acetate Inj Susp 6 (3-3) MG/ML | 22 10 99 02 10 18 10 | 00085056605 |
| Betamethasone | Betamethasone Sod Phosphate & Acetate Inj Susp 6 (3-3) MG/ML | 22 10 99 02 10 18 10 | 00085432001 |
| Betamethasone | Betamethasone Sod Phosphate & Acetate Inj Susp 6 (3-3) MG/ML | 22 10 99 02 10 18 10 | 00517072001 |
| Betamethasone | Betamethasone Sod Phosphate & Acetate Inj Susp 6 (3-3) MG/ML | 22 10 99 02 10 18 10 | 35356008401 |
| Betamethasone | Betamethasone Sod Phosphate & Acetate Inj Susp 6 (3-3) MG/ML | 22 10 99 02 10 18 10 | 40042004805 |
| Betamethasone | Betamethasone Sod Phosphate & Acetate Inj Susp 6 (3-3) MG/ML | 22 10 99 02 10 18 10 | 51754506001 |
| Betamethasone | Betamethasone Sod Phosphate & Acetate Inj Susp 6 (3-3) MG/ML | 22 10 99 02 10 18 10 | 54868020600 |
| Betamethasone | Betamethasone Sod Phosphate & Acetate Inj Susp 6 (3-3) MG/ML | 22 10 99 02 10 18 10 | 58016919101 |
| Betamethasone | Betamethasone Sod Phosphate & Acetate Inj Susp 6 (3-3) MG/ML | 22 10 99 02 10 18 10 | 68258890605 |
| Betamethasone | Betamethasone Sod Phosphate & Acetate Inj Susp 6 (3-3) MG/ML | 22 10 99 02 10 18 10 | 68258890705 |
| Betamethasone | Betamethasone Sod Phosphate & Acetate Inj Susp 6 (3-3) MG/ML | 22 10 99 02 10 18 10 | 68258895605 |
| Betamethasone | Betamethasone Sod Phosphate & Acetate Inj Susp 6 (3-3) MG/ML | 22 10 99 02 10 18 10 | 71283062002 |
| Betamethasone | Betamethasone Sod Phosphate & Acetate Inj Susp 7 (4-3) MG/ML | 22 10 99 02 10 18 30 | 62295328407 |
| Betamethasone | Betamethasone Sod Phosphate & Acetate Inj Susp 7 (4-3) MG/ML | 22 10 99 02 10 18 30 | 71283062105 |
| Betamethasone | Betamethasone Sodium Phosphate Inj 12 MG/2ML (6 MG/ML)       | 22 10 00 10 20 25    | 71266101502 |
| Betamethasone | Betamethasone Sodium Phosphate Inj 4 MG/ML (3MG/ML Base Eq)  | 22 10 00 10 20 05    | 00085087905 |
| Betamethasone | Betamethasone Sodium Phosphate Inj 4 MG/ML (3MG/ML Base Eq)  | 22 10 00 10 20 05    | 00182300962 |
| Betamethasone | Betamethasone Sodium Phosphate Inj 4 MG/ML (3MG/ML Base Eq)  | 22 10 00 10 20 05    | 00223726505 |
| Betamethasone | Betamethasone Sodium Phosphate Inj 4 MG/ML (3MG/ML Base Eq)  | 22 10 00 10 20 05    | 00259034905 |
| Betamethasone | Betamethasone Sodium Phosphate Inj 4 MG/ML (3MG/ML Base Eq)  | 22 10 00 10 20 05    | 00314639275 |
| Betamethasone | Betamethasone Sodium Phosphate Inj 4 MG/ML (3MG/ML Base Eq)  | 22 10 00 10 20 05    | 00364675153 |
| Betamethasone | Betamethasone Sodium Phosphate Inj 4 MG/ML (3MG/ML Base Eq)  | 22 10 00 10 20 05    | 00402021705 |
| Betamethasone | Betamethasone Sodium Phosphate Inj 4 MG/ML (3MG/ML Base Eq)  | 22 10 00 10 20 05    | 00418183105 |
| Betamethasone | Betamethasone Sodium Phosphate Inj 4 MG/ML (3MG/ML Base Eq)  | 22 10 00 10 20 05    | 00536354465 |
| Betamethasone | Betamethasone Sodium Phosphate Inj 4 MG/ML (3MG/ML Base Eq)  | 22 10 00 10 20 05    | 00785906005 |
| Betamethasone | Betamethasone Sodium Phosphate Inj 4 MG/ML (3MG/ML Base Eq)  | 22 10 00 10 20 05    | 00814116638 |
| Betamethasone | Betamethasone Sodium Phosphate Inj 4 MG/ML (3MG/ML Base Eq)  | 22 10 00 10 20 05    | 00839657425 |
| Betamethasone | Betamethasone Sodium Phosphate Inj 4 MG/ML (3MG/ML Base Eq)  | 22 10 00 10 20 05    | 00904045705 |
| Betamethasone | Betamethasone Sodium Phosphate Inj 4 MG/ML (3MG/ML Base Eq)  | 22 10 00 10 20 05    | 43797006111 |
| Betamethasone | Betamethasone Sodium Phosphate Inj 4 MG/ML (3MG/ML Base Eq)  | 22 10 00 10 20 05    | 47202414005 |
| Betamethasone | Betamethasone Sodium Phosphate Inj 4 MG/ML (3MG/ML Base Eq)  | 22 10 00 10 20 05    | 47679074820 |
| Betamethasone | Betamethasone Sodium Phosphate Inj 4 MG/ML (3MG/ML Base Eq)  | 22 10 00 10 20 05    | 52604021705 |
| Betamethasone | Betamethasone Sodium Phosphate Inj 4 MG/ML (3MG/ML Base Eq)  | 22 10 00 10 20 05    | 54274074909 |
| Betamethasone | Betamethasone Sodium Phosphate Inj 4 MG/ML (3MG/ML Base Eq)  | 22 10 00 10 20 05    | 54569237500 |
| Betamethasone | Betamethasone Sodium Phosphate Inj 4 MG/ML (3MG/ML Base Eq)  | 22 10 00 10 20 05    | 54569337700 |
| Betamethasone | Betamethasone Sodium Phosphate Inj 4 MG/ML (3MG/ML Base Eq)  | 22 10 00 10 20 05    | 57706853311 |
| Betamethasone | Betamethasone Sodium Phosphate Inj 6 MG/ML                   | 22 10 00 10 20 20    | 71266101501 |
| Betamethasone | Betamethasone Sodium Phosphate PF Inj 24 MG/2ML              | 22 10 00 10 20 35    | 62295301602 |
| Betamethasone | Betamethasone Sodium Phosphate Powder                        | 22 10 00 10 29 00    | 10695004610 |
| Betamethasone | Betamethasone Sodium Phosphate Powder                        | 22 10 00 10 29 00    | 37803021603 |
| Betamethasone | Betamethasone Sodium Phosphate Powder                        | 22 10 00 10 29 00    | 37803021604 |
| Betamethasone | Betamethasone Sodium Phosphate Powder                        | 22 10 00 10 29 00    | 37803021608 |
| Betamethasone | Betamethasone Sodium Phosphate Powder                        | 22 10 00 10 29 00    | 38779019500 |
| Betamethasone | Betamethasone Sodium Phosphate Powder                        | 22 10 00 10 29 00    | 38779019501 |
| Betamethasone | Betamethasone Sodium Phosphate Powder                        | 22 10 00 10 29 00    | 38779019503 |
| Betamethasone | Betamethasone Sodium Phosphate Powder                        | 22 10 00 10 29 00    | 38779019505 |
| Betamethasone | Betamethasone Sodium Phosphate Powder                        | 22 10 00 10 29 00    | 38779019506 |
| Betamethasone | Betamethasone Sodium Phosphate Powder                        | 22 10 00 10 29 00    | 38779019511 |
| Betamethasone | Betamethasone Sodium Phosphate Powder                        | 22 10 00 10 29 00    | 38779019515 |
| Betamethasone | Betamethasone Sodium Phosphate Powder                        | 22 10 00 10 29 00    | 49452107701 |
| Betamethasone | Betamethasone Sodium Phosphate Powder                        | 22 10 00 10 29 00    | 49452107702 |
| Betamethasone | Betamethasone Sodium Phosphate Powder                        | 22 10 00 10 29 00    | 49452107703 |
| Betamethasone | Betamethasone Sodium Phosphate Powder                        | 22 10 00 10 29 00    | 49452107704 |
| Betamethasone | Betamethasone Sodium Phosphate Powder                        | 22 10 00 10 29 00    | 49452107705 |
| Betamethasone | Betamethasone Sodium Phosphate Powder                        | 22 10 00 10 29 00    | 49452107706 |
| Betamethasone | Betamethasone Sodium Phosphate Powder                        | 22 10 00 10 29 00    | 51552006401 |
| Betamethasone | Betamethasone Sodium Phosphate Powder                        | 22 10 00 10 29 00    | 51552006402 |
| Betamethasone | Betamethasone Sodium Phosphate Powder                        | 22 10 00 10 29 00    | 51552006403 |
| Betamethasone | Betamethasone Sodium Phosphate Powder                        | 22 10 00 10 29 00    | 51552006404 |
| Betamethasone | Betamethasone Sodium Phosphate Powder                        | 22 10 00 10 29 00    | 51552006405 |
| Betamethasone | Betamethasone Sodium Phosphate Powder                        | 22 10 00 10 29 00    | 51552006409 |
| Betamethasone | Betamethasone Sodium Phosphate Powder                        | 22 10 00 10 29 00    | 51552006410 |
| Betamethasone | Betamethasone Sodium Phosphate Powder                        | 22 10 00 10 29 00    | 51927195100 |
| Betamethasone | Betamethasone Sodium Phosphate Powder                        | 22 10 00 10 29 00    | 52372083001 |
| Betamethasone | Betamethasone Sodium Phosphate Powder                        | 22 10 00 10 29 00    | 52372083002 |
| Betamethasone | Betamethasone Sodium Phosphate Powder                        | 22 10 00 10 29 00    | 52372083003 |
| Betamethasone | Betamethasone Sodium Phosphate Powder                        | 22 10 00 10 29 00    | 52372083004 |
| Betamethasone | Betamethasone Sodium Phosphate Powder                        | 22 10 00 10 29 00    | 52372083005 |
| Betamethasone | Betamethasone Sodium Phosphate Powder                        | 22 10 00 10 29 00    | 62991102401 |
| Betamethasone | Betamethasone Sodium Phosphate Powder                        | 22 10 00 10 29 00    | 62991102402 |
| Betamethasone | Betamethasone Sodium Phosphate Powder                        | 22 10 00 10 29 00    | 62991102403 |
| Betamethasone | Betamethasone Sodium Phosphate Powder                        | 22 10 00 10 29 00    | 62991102404 |
| Betamethasone | Betamethasone Sodium Phosphate Powder                        | 22 10 00 10 29 00    | 62991102405 |
| Betamethasone | Betamethasone Sodium Phosphate Powder                        | 22 10 00 10 29 00    | 62991102406 |
| Betamethasone | Betamethasone Sodium Phosphate Powder                        | 22 10 00 10 29 00    | 63370002806 |
| Betamethasone | Betamethasone Sodium Phosphate Powder                        | 22 10 00 10 29 00    | 63370002810 |
| Betamethasone | Betamethasone Sodium Phosphate Powder                        | 22 10 00 10 29 00    | 63370002815 |
| Betamethasone | Betamethasone Sodium Phosphate Powder                        | 22 10 00 10 29 00    | 63370002825 |
| Betamethasone | Betamethasone Sodium Phosphate Powder                        | 22 10 00 10 29 00    | 63370002835 |
| Betamethasone | Betamethasone Soln 0.6 MG/5ML                                | 22 10 00 10 00 10    | 00085094205 |
| Betamethasone | Betamethasone Tab 0.6 MG                                     | 22 10 00 10 00 03    | 00085001101 |
| Betamethasone | Betamethasone Tab 0.6 MG                                     | 22 10 00 10 00 03    | 00085001105 |
| Betamethasone | Betamethasone Tab 0.6 MG                                     | 22 10 00 10 00 03    | 40893051512 |
| Betamethasone | Betamethasone Tab 0.6 MG                                     | 22 10 00 10 00 03    | 52493051512 |
| Betamethasone | Betamethasone Tab 0.6 MG                                     | 22 10 00 10 00 03    | 60346076021 |
| Budesonide    | Budesonide Can SR 24HR 3 MG                                  | 22 10 00 12 00 70    | 00186070210 |
| Budesonide    | Budesonide Cap SR 24HR 3 MG                                  | 22 10 00 12 00 70    | 00378715501 |
| Budesonide    | Budesonide Cap SR 24HR 3 MG                                  | 22 10 00 12 00 70    | 00378715505 |
| Budesonide    | Budesonide Can SR 24HR 3 MG                                  | 22 10 00 12 00 70    | 49884050101 |





|                      |                                                              |                      |             |
|----------------------|--------------------------------------------------------------|----------------------|-------------|
| Cortisone            | Cortisone Acetate Tab 25 MG                                  | 22 10 00 15 10 03 10 | 00537206701 |
| Cortisone            | Cortisone Acetate Tab 25 MG                                  | 22 10 00 15 10 03 10 | 00580010601 |
| Cortisone            | Cortisone Acetate Tab 25 MG                                  | 22 10 00 15 10 03 10 | 00586051301 |
| Cortisone            | Cortisone Acetate Tab 25 MG                                  | 22 10 00 15 10 03 10 | 00586051303 |
| Cortisone            | Cortisone Acetate Tab 25 MG                                  | 22 10 00 15 10 03 10 | 00603306221 |
| Cortisone            | Cortisone Acetate Tab 25 MG                                  | 22 10 00 15 10 03 10 | 00615050201 |
| Cortisone            | Cortisone Acetate Tab 25 MG                                  | 22 10 00 15 10 03 10 | 00615050253 |
| Cortisone            | Cortisone Acetate Tab 25 MG                                  | 22 10 00 15 10 03 10 | 00615050263 |
| Cortisone            | Cortisone Acetate Tab 25 MG                                  | 22 10 00 15 10 03 10 | 00615050265 |
| Cortisone            | Cortisone Acetate Tab 25 MG                                  | 22 10 00 15 10 03 10 | 00677004601 |
| Cortisone            | Cortisone Acetate Tab 25 MG                                  | 22 10 00 15 10 03 10 | 00719124610 |
| Cortisone            | Cortisone Acetate Tab 25 MG                                  | 22 10 00 15 10 03 10 | 00781163001 |
| Cortisone            | Cortisone Acetate Tab 25 MG                                  | 22 10 00 15 10 03 10 | 00814204014 |
| Cortisone            | Cortisone Acetate Tab 25 MG                                  | 22 10 00 15 10 03 10 | 00839508406 |
| Cortisone            | Cortisone Acetate Tab 25 MG                                  | 22 10 00 15 10 03 10 | 00904204360 |
| Cortisone            | Cortisone Acetate Tab 25 MG                                  | 22 10 00 15 10 03 10 | 17236013801 |
| Cortisone            | Cortisone Acetate Tab 25 MG                                  | 22 10 00 15 10 03 10 | 51432011403 |
| Cortisone            | Cortisone Acetate Tab 25 MG                                  | 22 10 00 15 10 03 10 | 52544079801 |
| Cortisone            | Cortisone Acetate Tab 25 MG                                  | 22 10 00 15 10 03 10 | 54274016110 |
| Cortisone            | Cortisone Acetate Tab 25 MG                                  | 22 10 00 15 10 03 10 | 60429001501 |
| Cortisone            | Cortisone Acetate Tab 5 MG                                   | 22 10 00 15 10 03 03 | 00009001501 |
| Deflazacort          | Deflazacort Susp 22.75 MG/ML                                 | 22 10 00 17 00 18 30 | 42998050521 |
| Deflazacort          | Deflazacort Susp 22.75 MG/ML                                 | 22 10 00 17 00 18 30 | 52856050521 |
| Deflazacort          | Deflazacort Tab 18 MG                                        | 22 10 00 17 00 03 50 | 42998050203 |
| Deflazacort          | Deflazacort Tab 18 MG                                        | 22 10 00 17 00 03 50 | 52856050203 |
| Deflazacort          | Deflazacort Tab 30 MG                                        | 22 10 00 17 00 03 60 | 42998050303 |
| Deflazacort          | Deflazacort Tab 30 MG                                        | 22 10 00 17 00 03 60 | 52856050303 |
| Deflazacort          | Deflazacort Tab 36 MG                                        | 22 10 00 17 00 03 65 | 42998050403 |
| Deflazacort          | Deflazacort Tab 36 MG                                        | 22 10 00 17 00 03 65 | 52856050403 |
| Deflazacort          | Deflazacort Tab 6 MG                                         | 22 10 00 17 00 03 40 | 42998050101 |
| Deflazacort          | Deflazacort Tab 6 MG                                         | 22 10 00 17 00 03 40 | 52856050101 |
| Desoxycorticosterone | Desoxycorticosterone Acetate Pellets 125 MG                  | 22 20 00 10 10 89 20 | 00083223201 |
| Desoxycorticosterone | Desoxycorticosterone Pivalate Ini Susp 25 MG/ML              | 22 20 00 20 20 18 05 | 00083222201 |
| Dexamethasone        | *Dexamethasone Ini 10 MG/ML & Bupiv 0.5% & Lido 1% Kit**     | 22 10 99 03 20 64 30 | 53225421001 |
| Dexamethasone        | *Dexamethasone PF Ini 10 MG/ML & Bupiv 0.25% & Lido 1% Kit** | 22 10 99 03 20 64 20 | 45861013101 |
| Dexamethasone        | *Dexamethasone PF Ini 10 MG/ML & Bupiv 0.25% & Lido 1% Kit** | 22 10 99 03 20 64 20 | 63187034801 |
| Dexamethasone        | *Dexamethasone PF Ini 10 MG/ML & Bupiv 0.25% & Lido 1% Kit** | 22 10 99 03 20 64 20 | 76420076901 |
| Dexamethasone        | *Dexamethasone Sod Phos Ini 10 MG/ML & Anesth Snrv Kit***    | 22 10 99 02 57 64 20 | 76420027001 |
| Dexamethasone        | *Dexamethasone Sod Phos PF Ini 10 MG/ML & Bupiv 0.25% Kit*** | 22 10 99 02 58 64 20 | 45861013401 |
| Dexamethasone        | *Dexamethasone Sod Phos PF Ini 10 MG/ML & Bupiv 0.25% Kit*** | 22 10 99 02 58 64 20 | 76420081001 |
| Dexamethasone        | *Dexamethasone Sod Phos PF Ini 10 MG/ML & Lidocaine 1% Kit** | 22 10 99 02 60 64 20 | 45861013201 |
| Dexamethasone        | *Dexamethasone Sod Phos PF Ini 10 MG/ML & Lidocaine 1% Kit** | 22 10 99 02 60 64 20 | 76420076701 |
| Dexamethasone        | *Dexamethasone Sodium Phosphate Ini 10 MG/ML Kit***          | 22 10 00 20 20 64 25 | 53225366001 |
| Dexamethasone        | *Dexamethasone Sodium Phosphate PF Ini 10 MG/ML Kit***       | 22 10 00 20 20 64 20 | 45861013301 |
| Dexamethasone        | *Dexamethasone Sodium Phosphate PF Ini 10 MG/ML Kit***       | 22 10 00 20 20 64 20 | 69677007102 |
| Dexamethasone        | *Dexamethasone Sodium Phosphate PF Ini 10 MG/ML Kit***       | 22 10 00 20 20 64 20 | 70112055502 |
| Dexamethasone        | *Dexamethasone Sodium Phosphate PF Ini 10 MG/ML Kit***       | 22 10 00 20 20 64 20 | 76420076601 |
| Dexamethasone        | Dexamethasone Acetate & Sod Phosphate Ini Susp 8-4 MG/ML     | 22 10 99 02 15 18 30 | 62295305706 |
| Dexamethasone        | Dexamethasone Acetate & Sod Phosphate Ini Susp 8-4 MG/ML     | 22 10 99 02 15 18 30 | 71283062201 |
| Dexamethasone        | Dexamethasone Acetate Ini Susp 16 MG/5ML                     | 22 10 00 20 10 18 40 | 00456109705 |
| Dexamethasone        | Dexamethasone Acetate Ini Susp 16 MG/ML                      | 22 10 00 20 10 18 15 | 00456109741 |
| Dexamethasone        | Dexamethasone Acetate Ini Susp 16 MG/ML                      | 22 10 00 20 10 18 15 | 00785908005 |
| Dexamethasone        | Dexamethasone Acetate Ini Susp 16 MG/ML                      | 22 10 00 20 10 18 15 | 54569394000 |
| Dexamethasone        | Dexamethasone Acetate Ini Susp 16 MG/ML                      | 22 10 00 20 10 18 15 | 54569395300 |
| Dexamethasone        | Dexamethasone Acetate Ini Susp 16 MG/ML                      | 22 10 00 20 10 18 15 | 62295305807 |
| Dexamethasone        | Dexamethasone Acetate Ini Susp 16 MG/ML                      | 22 10 00 20 10 18 15 | 71283063001 |
| Dexamethasone        | Dexamethasone Acetate Ini Susp 8 MG/ML                       | 22 10 00 20 10 18 05 | 00006764401 |
| Dexamethasone        | Dexamethasone Acetate Ini Susp 8 MG/ML                       | 22 10 00 20 10 18 05 | 00006764403 |
| Dexamethasone        | Dexamethasone Acetate Ini Susp 8 MG/ML                       | 22 10 00 20 10 18 05 | 00063310414 |
| Dexamethasone        | Dexamethasone Acetate Ini Susp 8 MG/ML                       | 22 10 00 20 10 18 05 | 00131102604 |
| Dexamethasone        | Dexamethasone Acetate Ini Susp 8 MG/ML                       | 22 10 00 20 10 18 05 | 00144316313 |
| Dexamethasone        | Dexamethasone Acetate Ini Susp 8 MG/ML                       | 22 10 00 20 10 18 05 | 00182092862 |
| Dexamethasone        | Dexamethasone Acetate Ini Susp 8 MG/ML                       | 22 10 00 20 10 18 05 | 00191012352 |
| Dexamethasone        | Dexamethasone Acetate Ini Susp 8 MG/ML                       | 22 10 00 20 10 18 05 | 00223739005 |
| Dexamethasone        | Dexamethasone Acetate Ini Susp 8 MG/ML                       | 22 10 00 20 10 18 05 | 00259032805 |
| Dexamethasone        | Dexamethasone Acetate Ini Susp 8 MG/ML                       | 22 10 00 20 10 18 05 | 00304120755 |
| Dexamethasone        | Dexamethasone Acetate Ini Susp 8 MG/ML                       | 22 10 00 20 10 18 05 | 00314089775 |
| Dexamethasone        | Dexamethasone Acetate Ini Susp 8 MG/ML                       | 22 10 00 20 10 18 05 | 00349009275 |
| Dexamethasone        | Dexamethasone Acetate Ini Susp 8 MG/ML                       | 22 10 00 20 10 18 05 | 00364669953 |
| Dexamethasone        | Dexamethasone Acetate Ini Susp 8 MG/ML                       | 22 10 00 20 10 18 05 | 00385106375 |
| Dexamethasone        | Dexamethasone Acetate Ini Susp 8 MG/ML                       | 22 10 00 20 10 18 05 | 00402009205 |
| Dexamethasone        | Dexamethasone Acetate Ini Susp 8 MG/ML                       | 22 10 00 20 10 18 05 | 00418409131 |
| Dexamethasone        | Dexamethasone Acetate Ini Susp 8 MG/ML                       | 22 10 00 20 10 18 05 | 00456107505 |
| Dexamethasone        | Dexamethasone Acetate Ini Susp 8 MG/ML                       | 22 10 00 20 10 18 05 | 00463110405 |
| Dexamethasone        | Dexamethasone Acetate Ini Susp 8 MG/ML                       | 22 10 00 20 10 18 05 | 00524008115 |
| Dexamethasone        | Dexamethasone Acetate Ini Susp 8 MG/ML                       | 22 10 00 20 10 18 05 | 00536416365 |
| Dexamethasone        | Dexamethasone Acetate Ini Susp 8 MG/ML                       | 22 10 00 20 10 18 05 | 00537614275 |
| Dexamethasone        | Dexamethasone Acetate Ini Susp 8 MG/ML                       | 22 10 00 20 10 18 05 | 00551011005 |
| Dexamethasone        | Dexamethasone Acetate Ini Susp 8 MG/ML                       | 22 10 00 20 10 18 05 | 00588534475 |
| Dexamethasone        | Dexamethasone Acetate Ini Susp 8 MG/ML                       | 22 10 00 20 10 18 05 | 00677082220 |
| Dexamethasone        | Dexamethasone Acetate Ini Susp 8 MG/ML                       | 22 10 00 20 10 18 05 | 00719311986 |
| Dexamethasone        | Dexamethasone Acetate Ini Susp 8 MG/ML                       | 22 10 00 20 10 18 05 | 00779755260 |
| Dexamethasone        | Dexamethasone Acetate Ini Susp 8 MG/ML                       | 22 10 00 20 10 18 05 | 00781300875 |
| Dexamethasone        | Dexamethasone Acetate Ini Susp 8 MG/ML                       | 22 10 00 20 10 18 05 | 00785804505 |
| Dexamethasone        | Dexamethasone Acetate Ini Susp 8 MG/ML                       | 22 10 00 20 10 18 05 | 00814235538 |
| Dexamethasone        | Dexamethasone Acetate Ini Susp 8 MG/ML                       | 22 10 00 20 10 18 05 | 00839610925 |
| Dexamethasone        | Dexamethasone Acetate Ini Susp 8 MG/ML                       | 22 10 00 20 10 18 05 | 00904090605 |
| Dexamethasone        | Dexamethasone Acetate Ini Susp 8 MG/ML                       | 22 10 00 20 10 18 05 | 17236003695 |
| Dexamethasone        | Dexamethasone Acetate Ini Susp 8 MG/ML                       | 22 10 00 20 10 18 05 | 25332001105 |
| Dexamethasone        | Dexamethasone Acetate Ini Susp 8 MG/ML                       | 22 10 00 20 10 18 05 | 30727036085 |
| Dexamethasone        | Dexamethasone Acetate Ini Susp 8 MG/ML                       | 22 10 00 20 10 18 05 | 43797011311 |
| Dexamethasone        | Dexamethasone Acetate Ini Susp 8 MG/ML                       | 22 10 00 20 10 18 05 | 44437009205 |
| Dexamethasone        | Dexamethasone Acetate Ini Susp 8 MG/ML                       | 22 10 00 20 10 18 05 | 45985055505 |
| Dexamethasone        | Dexamethasone Acetate Ini Susp 8 MG/ML                       | 22 10 00 20 10 18 05 | 47202401005 |
| Dexamethasone        | Dexamethasone Acetate Ini Susp 8 MG/ML                       | 22 10 00 20 10 18 05 | 47649010603 |
| Dexamethasone        | Dexamethasone Acetate Ini Susp 8 MG/ML                       | 22 10 00 20 10 18 05 | 47679076020 |
| Dexamethasone        | Dexamethasone Acetate Ini Susp 8 MG/ML                       | 22 10 00 20 10 18 05 | 49072015505 |
| Dexamethasone        | Dexamethasone Acetate Ini Susp 8 MG/ML                       | 22 10 00 20 10 18 05 | 49072015510 |
| Dexamethasone        | Dexamethasone Acetate Ini Susp 8 MG/ML                       | 22 10 00 20 10 18 05 | 51432012709 |
| Dexamethasone        | Dexamethasone Acetate Ini Susp 8 MG/ML                       | 22 10 00 20 10 18 05 | 52349010405 |
| Dexamethasone        | Dexamethasone Acetate Ini Susp 8 MG/ML                       | 22 10 00 20 10 18 05 | 52604009205 |
| Dexamethasone        | Dexamethasone Acetate Ini Susp 8 MG/ML                       | 22 10 00 20 10 18 05 | 53638009205 |
| Dexamethasone        | Dexamethasone Acetate Ini Susp 8 MG/ML                       | 22 10 00 20 10 18 05 | 54274074009 |
| Dexamethasone        | Dexamethasone Acetate Ini Susp 8 MG/ML                       | 22 10 00 20 10 18 05 | 54569142300 |
| Dexamethasone        | Dexamethasone Acetate Ini Susp 8 MG/ML                       | 22 10 00 20 10 18 05 | 54569155400 |
| Dexamethasone        | Dexamethasone Acetate Ini Susp 8 MG/ML                       | 22 10 00 20 10 18 05 | 54569180801 |
| Dexamethasone        | Dexamethasone Acetate Ini Susp 8 MG/ML                       | 22 10 00 20 10 18 05 | 54569192200 |
| Dexamethasone        | Dexamethasone Acetate Ini Susp 8 MG/ML                       | 22 10 00 20 10 18 05 | 54868397700 |
| Dexamethasone        | Dexamethasone Acetate Ini Susp 8 MG/ML                       | 22 10 00 20 10 18 05 | 58441764403 |
| Dexamethasone        | Dexamethasone Acetate Ini Susp 8 MG/ML                       | 22 10 00 20 10 18 05 | 62295305907 |
| Dexamethasone        | Dexamethasone Acetate Ini Susp 8 MG/ML                       | 22 10 00 20 10 18 05 | 71283062901 |
| Dexamethasone        | Dexamethasone Acetate Powder                                 | 22 10 00 20 10 29 00 | 00574040905 |
| Dexamethasone        | Dexamethasone Acetate Powder                                 | 22 10 00 20 10 29 00 | 00574040910 |
| Dexamethasone        | Dexamethasone Acetate Powder                                 | 22 10 00 20 10 29 00 | 17317187002 |
| Dexamethasone        | Dexamethasone Acetate Powder                                 | 22 10 00 20 10 29 00 | 17317187008 |
| Dexamethasone        | Dexamethasone Acetate Powder                                 | 22 10 00 20 10 29 00 | 38779007001 |

































































































|               |                                  |    |    |    |    |    |    |    |             |
|---------------|----------------------------------|----|----|----|----|----|----|----|-------------|
| Triamcinolone | Triamcinolone Tab 4 MG           | 22 | 10 | 00 | 50 | 00 | 03 | 15 | 00228245410 |
| Triamcinolone | Triamcinolone Tab 4 MG           | 22 | 10 | 00 | 50 | 00 | 03 | 15 | 00302728001 |
| Triamcinolone | Triamcinolone Tab 4 MG           | 22 | 10 | 00 | 50 | 00 | 03 | 15 | 00302728005 |
| Triamcinolone | Triamcinolone Tab 4 MG           | 22 | 10 | 00 | 50 | 00 | 03 | 15 | 00304028101 |
| Triamcinolone | Triamcinolone Tab 4 MG           | 22 | 10 | 00 | 50 | 00 | 03 | 15 | 00304028105 |
| Triamcinolone | Triamcinolone Tab 4 MG           | 22 | 10 | 00 | 50 | 00 | 03 | 15 | 00349236501 |
| Triamcinolone | Triamcinolone Tab 4 MG           | 22 | 10 | 00 | 50 | 00 | 03 | 15 | 00349236510 |
| Triamcinolone | Triamcinolone Tab 4 MG           | 22 | 10 | 00 | 50 | 00 | 03 | 15 | 00364035201 |
| Triamcinolone | Triamcinolone Tab 4 MG           | 22 | 10 | 00 | 50 | 00 | 03 | 15 | 00364035205 |
| Triamcinolone | Triamcinolone Tab 4 MG           | 22 | 10 | 00 | 50 | 00 | 03 | 15 | 00405504201 |
| Triamcinolone | Triamcinolone Tab 4 MG           | 22 | 10 | 00 | 50 | 00 | 03 | 15 | 00469512430 |
| Triamcinolone | Triamcinolone Tab 4 MG           | 22 | 10 | 00 | 50 | 00 | 03 | 15 | 00469512471 |
| Triamcinolone | Triamcinolone Tab 4 MG           | 22 | 10 | 00 | 50 | 00 | 03 | 15 | 00536471701 |
| Triamcinolone | Triamcinolone Tab 4 MG           | 22 | 10 | 00 | 50 | 00 | 03 | 15 | 00536471705 |
| Triamcinolone | Triamcinolone Tab 4 MG           | 22 | 10 | 00 | 50 | 00 | 03 | 15 | 00537602101 |
| Triamcinolone | Triamcinolone Tab 4 MG           | 22 | 10 | 00 | 50 | 00 | 03 | 15 | 00537602105 |
| Triamcinolone | Triamcinolone Tab 4 MG           | 22 | 10 | 00 | 50 | 00 | 03 | 15 | 00580035701 |
| Triamcinolone | Triamcinolone Tab 4 MG           | 22 | 10 | 00 | 50 | 00 | 03 | 15 | 00591538801 |
| Triamcinolone | Triamcinolone Tab 4 MG           | 22 | 10 | 00 | 50 | 00 | 03 | 15 | 00591538803 |
| Triamcinolone | Triamcinolone Tab 4 MG           | 22 | 10 | 00 | 50 | 00 | 03 | 15 | 00591538804 |
| Triamcinolone | Triamcinolone Tab 4 MG           | 22 | 10 | 00 | 50 | 00 | 03 | 15 | 00615161401 |
| Triamcinolone | Triamcinolone Tab 4 MG           | 22 | 10 | 00 | 50 | 00 | 03 | 15 | 00677042601 |
| Triamcinolone | Triamcinolone Tab 4 MG           | 22 | 10 | 00 | 50 | 00 | 03 | 15 | 00781167001 |
| Triamcinolone | Triamcinolone Tab 4 MG           | 22 | 10 | 00 | 50 | 00 | 03 | 15 | 00783216709 |
| Triamcinolone | Triamcinolone Tab 4 MG           | 22 | 10 | 00 | 50 | 00 | 03 | 15 | 00814800014 |
| Triamcinolone | Triamcinolone Tab 4 MG           | 22 | 10 | 00 | 50 | 00 | 03 | 15 | 00814800028 |
| Triamcinolone | Triamcinolone Tab 4 MG           | 22 | 10 | 00 | 50 | 00 | 03 | 15 | 00839500906 |
| Triamcinolone | Triamcinolone Tab 4 MG           | 22 | 10 | 00 | 50 | 00 | 03 | 15 | 00904088460 |
| Triamcinolone | Triamcinolone Tab 4 MG           | 22 | 10 | 00 | 50 | 00 | 03 | 15 | 51432046403 |
| Triamcinolone | Triamcinolone Tab 4 MG           | 22 | 10 | 00 | 50 | 00 | 03 | 15 | 51728002701 |
| Triamcinolone | Triamcinolone Tab 4 MG           | 22 | 10 | 00 | 50 | 00 | 03 | 15 | 51728083316 |
| Triamcinolone | Triamcinolone Tab 4 MG           | 22 | 10 | 00 | 50 | 00 | 03 | 15 | 52446047621 |
| Triamcinolone | Triamcinolone Tab 4 MG           | 22 | 10 | 00 | 50 | 00 | 03 | 15 | 54274037310 |
| Triamcinolone | Triamcinolone Tab 4 MG           | 22 | 10 | 00 | 50 | 00 | 03 | 15 | 57317060010 |
| Triamcinolone | Triamcinolone Tab 4 MG           | 22 | 10 | 00 | 50 | 00 | 03 | 15 | 57317060030 |
| Triamcinolone | Triamcinolone Tab 4 MG           | 22 | 10 | 00 | 50 | 00 | 03 | 15 | 58729045435 |
| Triamcinolone | Triamcinolone Tab 4 MG Dose Pack | 22 | 10 | 00 | 50 | 00 | 64 | 05 | 00254593009 |
| Triamcinolone | Triamcinolone Tab 4 MG Dose Pack | 22 | 10 | 00 | 50 | 00 | 64 | 05 | 00469512316 |
| Triamcinolone | Triamcinolone Tab 4 MG Dose Pack | 22 | 10 | 00 | 50 | 00 | 64 | 05 | 00603617014 |
| Triamcinolone | Triamcinolone Tab 4 MG Dose Pack | 22 | 10 | 00 | 50 | 00 | 64 | 05 | 00615052726 |
| Triamcinolone | Triamcinolone Tab 4 MG Dose Pack | 22 | 10 | 00 | 50 | 00 | 64 | 05 | 00904088444 |
| Triamcinolone | Triamcinolone Tab 4 MG Dose Pack | 22 | 10 | 00 | 50 | 00 | 64 | 05 | 54274046916 |
| Triamcinolone | Triamcinolone Tab 4 MG Dose Pack | 22 | 10 | 00 | 50 | 00 | 64 | 05 | 54569273500 |
| Triamcinolone | Triamcinolone Tab 4 MG Dose Pack | 22 | 10 | 00 | 50 | 00 | 64 | 05 | 57317060016 |
| Triamcinolone | Triamcinolone Tab 4 MG Dose Pack | 22 | 10 | 00 | 50 | 00 | 64 | 05 | 60904045435 |
| Triamcinolone | Triamcinolone Tab 8 MG           | 22 | 10 | 00 | 50 | 00 | 03 | 20 | 00003051840 |
| Triamcinolone | Triamcinolone Tab 8 MG           | 22 | 10 | 00 | 50 | 00 | 03 | 20 | 00005444418 |
| Triamcinolone | Triamcinolone Tab 8 MG           | 22 | 10 | 00 | 50 | 00 | 03 | 20 | 00469512550 |
| Triamcinolone | Triamcinolone Tab 8 MG           | 22 | 10 | 00 | 50 | 00 | 03 | 20 | 57317060350 |

GPI: Generic Product Identifier; NDC: National Drug Code; PNH: paroxysmal nocturnal hemoglobinuria

**Supplemental Table 7. HCPCS Codes for Other PNH-Related Treatments of Interest**

| Treatment          |                                                  | Description                                                                                                                                                                                                                                                                                                                                    | Code  |
|--------------------|--------------------------------------------------|------------------------------------------------------------------------------------------------------------------------------------------------------------------------------------------------------------------------------------------------------------------------------------------------------------------------------------------------|-------|
| Anticoagulants     |                                                  | Warfarin or another fda approved oral anticoagulant is prescribed                                                                                                                                                                                                                                                                              | G8967 |
|                    |                                                  | Patient documented to have been prescribed an anticoagulant at discharge                                                                                                                                                                                                                                                                       | G8225 |
|                    |                                                  | Injection, heparin sodium, (heparin lock flush), per 10 units                                                                                                                                                                                                                                                                                  | J1642 |
|                    |                                                  | Injection, heparin sodium, per 1000 units                                                                                                                                                                                                                                                                                                      | J1644 |
|                    |                                                  | Injection, dalteparin sodium, per 2500 iu                                                                                                                                                                                                                                                                                                      | J1645 |
|                    |                                                  | Injection, enoxaparin sodium, 10 mg                                                                                                                                                                                                                                                                                                            | J1650 |
|                    |                                                  | Injection, tinzaparin sodium, 1000 iu                                                                                                                                                                                                                                                                                                          | J1655 |
|                    |                                                  | Injection, fondaparinux sodium, 0.5 mg                                                                                                                                                                                                                                                                                                         | J1652 |
|                    |                                                  | Injection, bivalirudin, 1 mg                                                                                                                                                                                                                                                                                                                   | J0583 |
|                    |                                                  | Injection, lepirudin, 50 mg                                                                                                                                                                                                                                                                                                                    | J1945 |
|                    |                                                  | Injection, argatroban, per 5 mg                                                                                                                                                                                                                                                                                                                | C9121 |
|                    |                                                  | Injection, argatroban, 1 mg (for non-esrd use)                                                                                                                                                                                                                                                                                                 | J0883 |
|                    |                                                  | Home infusion therapy, continuous anticoagulant infusion therapy (e.g. heparin), administrative services, professional pharmacy services, care coordination and all necessary supplies and equipment (drugs and nursing visits coded separately), per diem                                                                                     | S9336 |
|                    |                                                  | Home therapy; intermittent anticoagulant injection therapy (e.g. heparin); administrative services, professional pharmacy services, care coordination, and all necessary supplies and equipment (drugs and nursing visits coded separately), per diem (do not use this code for flushing of infusion devices with heparin to maintain patency) | S9372 |
| Immunosuppressants | Anti-thymocyte globulin (ATG)                    | Lymphocyte immune globulin, antithymocyte globulin, equine, parenteral, 250 mg                                                                                                                                                                                                                                                                 | J7504 |
|                    |                                                  | Lymphocyte immune globulin, antithymocyte globulin, rabbit, parenteral, 25 mg                                                                                                                                                                                                                                                                  | J7511 |
|                    | Azathioprine                                     | Azathioprine, oral, 50 mg                                                                                                                                                                                                                                                                                                                      | J7500 |
|                    |                                                  | Azathioprine, parenteral, 100 mg                                                                                                                                                                                                                                                                                                               | J7501 |
|                    | Cyclosporine                                     | Cyclosporine, oral, 25 mg                                                                                                                                                                                                                                                                                                                      | J7515 |
|                    |                                                  | Cyclosporine, oral, 100 mg                                                                                                                                                                                                                                                                                                                     | J7502 |
|                    |                                                  | Cyclosporine, parenteral, 250 mg                                                                                                                                                                                                                                                                                                               | J7516 |
| Others             | Immunosuppressive drug, not otherwise classified | J7599                                                                                                                                                                                                                                                                                                                                          |       |
| Iron therapy       |                                                  | Injection, Ferric Carboxymaltose, 1 mg                                                                                                                                                                                                                                                                                                         | J1439 |
|                    |                                                  | Injection, Iron Dextran, 50 mg                                                                                                                                                                                                                                                                                                                 | J1750 |
|                    |                                                  | Injection, Iron Sucrose, 1 mg (Venofer®)                                                                                                                                                                                                                                                                                                       | J1756 |
|                    |                                                  | Injection, Sodium Ferric Gluconate Complex in Sucrose Injection, 12.5 mg (Ferrolecit®)                                                                                                                                                                                                                                                         | J2916 |
|                    |                                                  | Injection, Ferumoxytol, for treatment of Iron Deficiency Anemia, 1 mg (Non-ESRD use)                                                                                                                                                                                                                                                           | Q0138 |
|                    |                                                  | Injection, Ferumoxytol, for treatment of Iron Deficiency Anemia, 1 mg (For ESRD on dialysis)                                                                                                                                                                                                                                                   | Q0139 |

ATG: Anti-thymocyte globulin; HCPCS: Healthcare Commons Procedure Coding System; PNH: paroxysmal nocturnal hemoglobinuria

**Supplemental Table 8. GPI Codes for Other PNH-Related Treatments of Interest**

| <b>Treatment</b>       | <b>Description</b>                                  | <b>Code</b>    |
|------------------------|-----------------------------------------------------|----------------|
| Androgen therapy       | Androgens                                           | 23 10 00       |
|                        | Androgen Combinations                               | 23 10 99       |
|                        | Anabolic Steroids                                   | 23 20 00       |
| Anticoagulants         | Anticoagulants                                      | 83             |
| Iron chelation therapy | Deferasirox                                         | 93 10 00 25 00 |
| Iron therapy           | Iron Supplements                                    | 82 30 00       |
| Immunosuppressants     | Lymphocyte immune globulin, anti-thymocyte globulin | 99 40 25 40    |
|                        | Azathioprine                                        | 99 40 60 10 00 |
|                        | Azathioprine Sodium                                 | 99 40 60 10 10 |
|                        | Cyclosporine                                        | 99 40 20 20    |
|                        | Cyclosporine (Bulk)                                 | 96 46 88 10 00 |

GPI: Generic Product Identifier; PNH: paroxysmal nocturnal hemoglobinuria

**Supplemental Table 9. CPT, HCPCS, and ICD-9/10-PCS Codes for Blood Transfusions**

| Code type                                                                                 | Description                                                                                     | Code                                                                                   |         |
|-------------------------------------------------------------------------------------------|-------------------------------------------------------------------------------------------------|----------------------------------------------------------------------------------------|---------|
| CPT                                                                                       | Transfusion, blood or blood components                                                          | 36430                                                                                  |         |
|                                                                                           | Blood (whole), for transfusion, per unit                                                        | P9010                                                                                  |         |
|                                                                                           | Blood, split unit                                                                               | P9011                                                                                  |         |
|                                                                                           | Cryoprecipitate, each unit                                                                      | P9012                                                                                  |         |
|                                                                                           | Red blood cells, leukocytes reduced, each unit                                                  | P9016                                                                                  |         |
|                                                                                           | Fresh frozen plasma (single donor), frozen within 8 hours of collection, each unit              | P9017                                                                                  |         |
|                                                                                           | Red blood cells, each unit                                                                      | P9021                                                                                  |         |
|                                                                                           | Red blood cells, washed, each unit                                                              | P9022                                                                                  |         |
|                                                                                           | Plasma, pooled multiple donor, solvent/detergent treated, frozen, each unit                     | P9023                                                                                  |         |
|                                                                                           | Red blood cells, irradiated, each unit                                                          | P9038                                                                                  |         |
|                                                                                           | Red blood cells, deglycerolized, each unit                                                      | P9039                                                                                  |         |
|                                                                                           | HCPCS                                                                                           | Red blood cells, leukocytes reduced, irradiated, each unit                             | P9040   |
|                                                                                           |                                                                                                 | Infusion, plasma protein fraction (human), 5%, 50 ml                                   | P9043   |
| Plasma, cryoprecipitate reduced, each unit                                                |                                                                                                 | P9044                                                                                  |         |
| Infusion, plasma protein fraction (human), 5%, 250 ml                                     |                                                                                                 | P9048                                                                                  |         |
| Whole blood or red blood cells, leukocytes reduced, CMV-negative, each unit               |                                                                                                 | P9051                                                                                  |         |
| Whole blood or red blood cells, leukocytes reduced, frozen, deglycerol, washed, each unit |                                                                                                 | P9054                                                                                  |         |
| Whole blood, leukocytes reduced, irradiated, each unit                                    |                                                                                                 | P9056                                                                                  |         |
| Red blood cells, frozen/deglycerolized/washed, leukocytes reduced, irradiated, each unit  |                                                                                                 | P9057                                                                                  |         |
| Red blood cells, leukocytes reduced, CMV-negative, irradiated, each unit                  |                                                                                                 | P9058                                                                                  |         |
| Fresh frozen plasma between 8-24 hours of collection, each unit                           |                                                                                                 | P9059                                                                                  |         |
| Fresh frozen plasma, donor retested, each unit                                            |                                                                                                 | P9060                                                                                  |         |
| ICD-10-PCS                                                                                |                                                                                                 | Transfusion of nonautologous frozen plasma into peripheral vein, percutaneous approach | 30233K1 |
|                                                                                           |                                                                                                 | Transfusion of nonautologous fresh plasma into peripheral vein, percutaneous approach  | 30233L1 |
|                                                                                           | Transfusion of nonautologous plasma cryoprecipitate into peripheral vein, percutaneous approach | 30233M1                                                                                |         |
|                                                                                           | Transfusion of nonautologous red blood cells into peripheral vein, percutaneous approach        | 30233N1                                                                                |         |
| ICD-9-PCS                                                                                 | Transfusion of nonautologous frozen red cells into peripheral vein, percutaneous approach       | 30233P1                                                                                |         |
|                                                                                           | Transfusion of packed cells                                                                     | 99.04                                                                                  |         |
|                                                                                           | Transfusion of other serum                                                                      | 99.07                                                                                  |         |

CPT: Current Procedural Terminology; HCPCS: Healthcare Commons Procedure Coding System; ICS-10-PCS: International Classification of Diseases, 10th Revision, Procedure Coding System; PNH: paroxysmal nocturnal hemoglobinuria



**Supplemental Table 10. ICD-9/10-CM Codes for Elixhauser Comorbidities**

| Condition                                                                            | ICD-9-CM Diagnosis Codes                                                                                                    | ICD-10-CM Diagnosis Codes                                                                                                                                                                    |
|--------------------------------------------------------------------------------------|-----------------------------------------------------------------------------------------------------------------------------|----------------------------------------------------------------------------------------------------------------------------------------------------------------------------------------------|
| Alcohol abuse                                                                        | 265.2, 291.1–291.3, 291.5–291.9, 303.3, 303.9, 305.0, 375.5, 425.5, 535.3, 571.0–571.3, 980, V11.3                          | F10.x, E52.x, G62.1, I42.6, K29.2x, K70.0, K70.3x, K70.9, T51.x, Z50.2, Z71.4, Z72.1                                                                                                         |
| Blood loss anemia                                                                    | 280                                                                                                                         | D50.0                                                                                                                                                                                        |
| Cardiac arrhythmias                                                                  | 426.0, 426.10, 426.12, 426.13, 426.7, 426.9, 427–427.4, 427.6–427.9, 785.0, 996.01, 996.04, V50.0, V53.3                    | A52.0x, I05.x–I08.x, I09.1, I09.8x, I34.x–I39, Q23.0–Q23.3, Z95.2–Z95.4                                                                                                                      |
| Chronic peptic ulcer disease (includes bleeding only if obstruction is also present) | 531.7, 531.9, 532.7, 532.9, 533.7, 533.9, 534.7, 534.9                                                                      | K25.7, K25.9, K26.7, K26.9, K27.7, K27.9, K28.7, K28.9                                                                                                                                       |
| Chronic pulmonary disease                                                            | 490–492, 493, 494–505, 506.4,                                                                                               | I27.8x, I27.9, J40–J47, J60–J67, J68.4, J70.1, J70.3                                                                                                                                         |
| Coagulation deficiency                                                               | 286, 287.1, 287.3–287.5                                                                                                     | D65–D68.x, D69.1, D69.3–D69.6                                                                                                                                                                |
| Congestive heart failure                                                             | 398.91, 402.01, 402.11, 402.91, 404.01, 404.03, 404.11, 404.13, 404.91, 404.93, 425.4–425.9, 428                            | I09.9, I11.0, I13.0, I13.2, I25.5, I42.0, I42.5–I42.9, I43, I50.x, P29.0                                                                                                                     |
| Deficiency anemias                                                                   | 280.1–280.9, 281                                                                                                            | D50.8, D50.9, D51.x–D53.x                                                                                                                                                                    |
| Depression                                                                           | 296.2, 296.3, 296.5, 300.4, 309, 311                                                                                        | F20.4, F31.3x–F31.5, F32, F33, F34.1, F41.2, F43.2x                                                                                                                                          |
| Diabetes with chronic complications                                                  | 250.4–250.9, 775.1                                                                                                          | E10.2x–E10.5x, E10.7x, E11.2x–E11.5x, E11.7x, E12.2x–E12.5x, E12.7x, E13.2x–E13.5x, E13.7x, E14.2x–E14.5x, E14.7x                                                                            |
| Diabetes without chronic complications                                               | 250.00–250.3                                                                                                                | E10.0x, E10.1x, E10.6x, E10.8, E10.9, E11.0x, E11.1x, E11.6x, E11.8, E11.9, E12.0x, E12.1x, E12.6x, E12.8, E12.9, E13.0x, E13.1x, E13.6x, E13.8, E13.9, E14.0x, E14.1x, E14.6x, E14.8, E14.9 |
| Drug abuse                                                                           | 292.0, 304, 305.2–305.9, V65.42                                                                                             | F11.x–F16.x, F18.x, F19.x, Z71.5x, Z72.2                                                                                                                                                     |
| Fluid and electrolyte disorders                                                      | 253.6, 276                                                                                                                  | E22.2, E86.x, E87.x                                                                                                                                                                          |
| HIV/AIDS                                                                             | 042–044                                                                                                                     | B20.x–B22.x, B24                                                                                                                                                                             |
| Hypertension (without complications)                                                 | 401.1                                                                                                                       | I10                                                                                                                                                                                          |
| Hypertension (with complications)                                                    | 402–405                                                                                                                     | I11.x–I13.x, I15.x                                                                                                                                                                           |
| Hypothyroidism                                                                       | 240.9, 434, 244, 246.1, 246.8                                                                                               | E00.x–E03.x, E89.0                                                                                                                                                                           |
| Liver disease                                                                        | 070.22, 070.23, 070.33, 070.44, 070.54, 070.6, 070.9, 456.0–456.2, 570, 571, 572.2–572.8, 573.3, 573.4, 573.8, 573.9, V42.7 | B18.x, I85.x, I86.4, I98.2, K70.x, K71.1x, K71.3–K71.5x, K71.7, K72.x–K74x, K76.0, K76.2–K76.9, Z94.4                                                                                        |
| Lymphoma                                                                             | 200–202, 203.0, 238.6                                                                                                       | C81.x–C85.x, C88.x, C96.x, C90.0, C90.2x                                                                                                                                                     |
| Metastatic cancer                                                                    | 196–199                                                                                                                     | C77.x–C80.x                                                                                                                                                                                  |
| Obesity                                                                              | 278                                                                                                                         | E66.x                                                                                                                                                                                        |
| Other neurological disorders                                                         | 330–331, 332.0, 333.4, 333.5, 334–335, 340, 341.1–341.9, 345, 347, 780.3, 784.3                                             | G10–G13.x, G20–G22, G25.4, G25.5, G31.2, G31.8x, G31.9, G32.x, G35–G37.x, G40.x, G41.x, G93.1, G93.4x, R47.0x, R56.x                                                                         |
| Paralysis                                                                            | 334.1, 342, 343, 344.0–344.6, 344.9                                                                                         | G04.1, G11.4, G80.1, G80.2, G81.x, G82.x, G83.0–G83.4, G83.9                                                                                                                                 |
| Peripheral vascular disease                                                          | 093.0, 437.3, 440, 441, 443.1–443.9, 447.1, 557.1, 557.9, V43.4                                                             | I70.x, I81, I73.1, I73.8, I73.9, I77.1, I79.0, I79.2, K55.1, K55.8, K55.9, Z95.8x, Z95.9                                                                                                     |
| Psychoses                                                                            | 293.8, 295, 296.04, 296.14, 296.44, 296.54, 297, 298                                                                        | F20.x, F22–F25.x, F28, F29, F30.2, F31.2, F31.5                                                                                                                                              |
| Pulmonary circulation disorders                                                      | 415.0, 415.1, 416, 417.0, 417.8, 417.9                                                                                      | I26.x, I27.x, I28.0, I28.8, I28.9                                                                                                                                                            |
| Renal failure                                                                        | 403.01, 403.11, 403.91, 404.02, 404.03, 404.12, 404.13, 404.92, 404.93, 585, 586, 588, V42.0, V45.1, V56                    | I12.0, I13.1x, N18.x, N19, N25.0, Z49.0x–Z49.2, Z94.0, Z99.2                                                                                                                                 |
| Rheumatoid arthritis/collagen vascular diseases                                      | 446, 701.0, 710.0–710.4, 710.8, 710.9, 711.2, 714, 719.3, 720, 725, 728.5, 728.89, 729.30                                   | L94.0, L94.1, L94.3, M05.x, M06.x, M08.x, M12.x, M30.x, M31.x–M31.3, M32.x–M35.x, M45.x, M46.x                                                                                               |
| Solid tumor without metastasis                                                       | 140–172, 174–195                                                                                                            | C00.x–C26.x, C30.x–C34.x, C37.x–C41.x, C43.x, C45.x–C58.x, C60.x–C76.x, C97                                                                                                                  |
| Valvular disease                                                                     | 093.2, 394–397, 397.9, 424, 746.3–746.6, V42.2, V43.3                                                                       | A52.0x, I05.x–I08.x, I09.1, I09.8x, I34.x–I39, Q23.0–Q23.3, Z95.2–Z95.4                                                                                                                      |
| Weight loss                                                                          | 260–263, 783.2, 799.4                                                                                                       | E40–E46, R63.4, R64                                                                                                                                                                          |

AIDS: acquired immune deficiency syndrome; HIV: human immunodeficiency viruses; ICD-10-CM: International Classification of Diseases, 10th Revision, Clinical Modification

**Source:**

Quan H, Sundararajan V, Halfon P, et al. Coding algorithms for defining comorbidities in ICD-9-CM and ICD-10 administrative data. *Med Care*. 2005;43(11):1130-1139. doi:10.1097/01.mlr.0000182534.19832.83.
